# Supplementary material for: Tannic acid directly targets pyruvate kinase isoenzyme M2 to attenuate colon cancer cell proliferation
Source: Royal Society of Chemistry journal article supplement (doi:10.1039/c8fo01161c), 2018-01-01

**Fig. S1. Effects of TA-functionalized magnetite nanoparticles on the proliferation of CRC cells.**

DLD1 (A) and HCT-116 (B) cells were seeded into 96-well plates and treated with TA and TA-functionalized magnetite nanoparticles at a concentration of 30  $\mu$ M for 24 h. The percentages of viable cells were determined using MTT assay.

**Fig. S2. Effects of TA-functionalized magnetite nanoparticles on lactate production by CRC cells.**

Lactate production levels were determined in DLD1 (A) and HCT-116 (B) cells treated with the indicated concentrations of TA and TA-functionalized magnetite nanoparticles.

**Fig. S3. PKM2 mutants were used for experimental analysis.**

(A) PKM1 expression levels were analysed using qPCR in DLD1 and HCT-116 cells transfected with GFP-tagged human PKM1. (B) Pyruvate kinase activity was determined in DLD1-PKM1 cells. (C) SDS-PAGE was used to analyse the purified recombinant His-R399E and His-K433E proteins.

**Fig. S4. Effects of TA-functionalized magnetite nanoparticles on the glycolytic activity of PKM2 in CRC cells.**

The PKM2 catalytic activities of DLD1 (A) and HCT-116 (B) cells treated with the indicated concentrations of TA and TA-functionalized magnetite nanoparticles were measured at an absorbance of 340 nm due to the oxidation of NADH.

Fig. S1

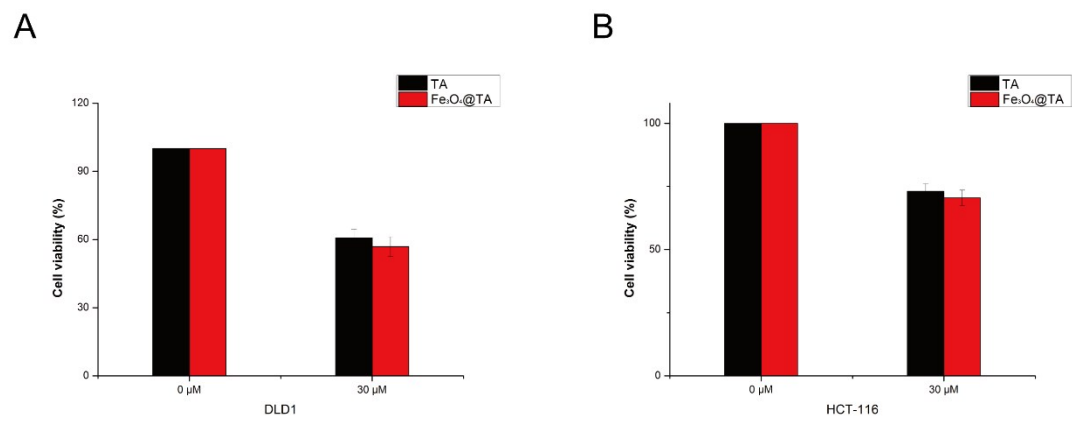

Fig. S2

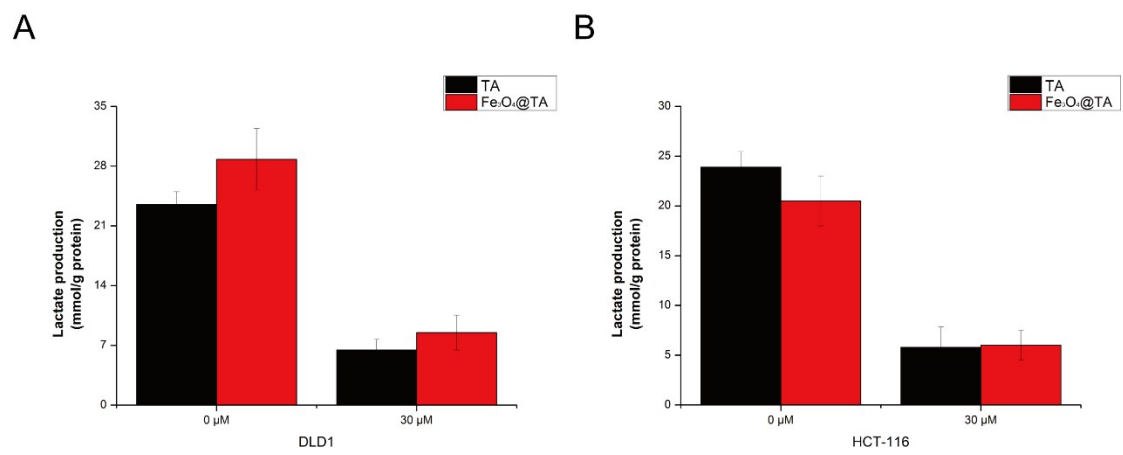

Fig. S3

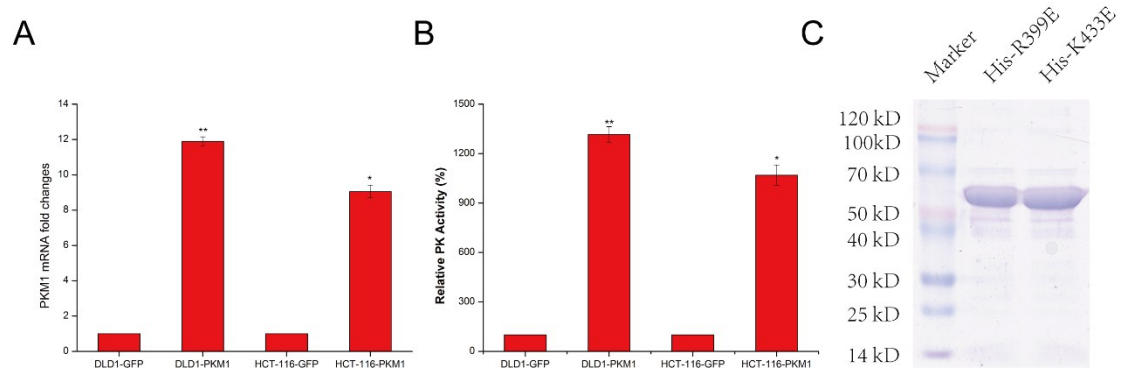

Fig. S4

A

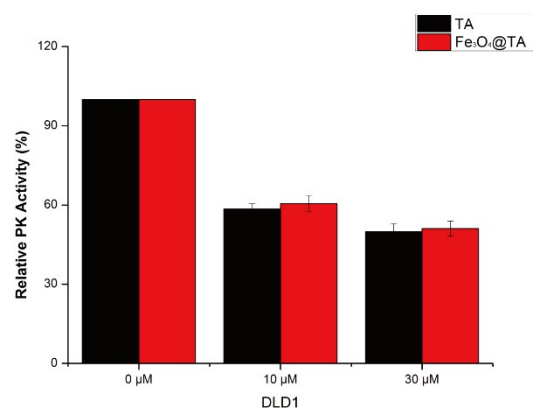

B

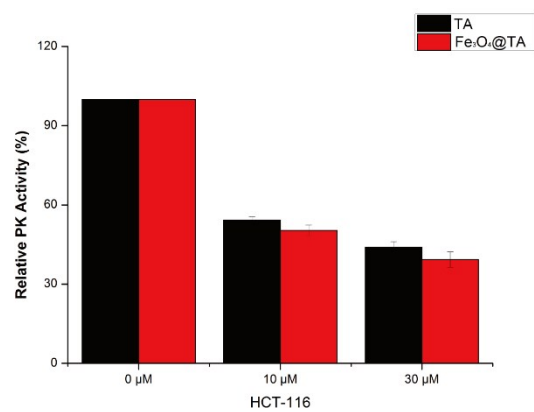

Supplement: c8fo01161c1.pdf [file c8fo01161c1.pdf]
